# Supplementary material
Source: HighWire-hosted journal article supplement (https://bibliotheek.ehb.be:2611/highwire/filestream/186770/field_highwire_adjunct_files/1/93123webonlysupp2.pdf)
Supplement: 93123webonlysupp2.pdf [file 93123webonlysupp2.pdf]

**Supplement Figure B: Example of instrument:**

**FINE MOTOR:**

|                                                                                                                                                                                                                                        |                                                                                                                                                                                                                                                                     |                                                                                                                                                                                                                                                                 |                                                                                                                                                                                                                               |                                                                                                                                                                                                                                      |                                                                                                                                                                                                                                           |                                                                                                                                                                                                                                    |
|----------------------------------------------------------------------------------------------------------------------------------------------------------------------------------------------------------------------------------------|---------------------------------------------------------------------------------------------------------------------------------------------------------------------------------------------------------------------------------------------------------------------|-----------------------------------------------------------------------------------------------------------------------------------------------------------------------------------------------------------------------------------------------------------------|-------------------------------------------------------------------------------------------------------------------------------------------------------------------------------------------------------------------------------|--------------------------------------------------------------------------------------------------------------------------------------------------------------------------------------------------------------------------------------|-------------------------------------------------------------------------------------------------------------------------------------------------------------------------------------------------------------------------------------------|------------------------------------------------------------------------------------------------------------------------------------------------------------------------------------------------------------------------------------|
| 1. Kuya chindu nineso<br><br>Yelo <input type="checkbox"/> Iyai <input type="checkbox"/> Ngingu- <input type="checkbox"/>                             | 2. Kuwika makono pampepe<br><br>Yelo <input type="checkbox"/> Iyai <input type="checkbox"/> Ngingu- <input type="checkbox"/>                                                       | 3. Mpana alinje kamula chindu<br><br>Yelo <input type="checkbox"/> Iyai <input type="checkbox"/> Ngingu- <input type="checkbox"/>                                              | 4. Kamula mwamachili<br><br>Yelo <input type="checkbox"/> Iyai <input type="checkbox"/> Ngingu- <input type="checkbox"/>                     | 5. Mpakana alame niku lola chang'andila<br><br>Yelo <input type="checkbox"/> Iyai <input type="checkbox"/> Ngingu- <input type="checkbox"/>        | 6. Mpaka ayiwone yindu yanwana mpela mitesa<br><br>Yelo <input type="checkbox"/> Iyai <input type="checkbox"/> Ngingu- <input type="checkbox"/>        | 7. Mpakana aioko te chindu chekulungwa<br><br>Yelo <input type="checkbox"/> Iyai <input type="checkbox"/> Ngingu- <input type="checkbox"/>      |
| 8. Chakamwile wanchiji mpakana awiche nkono walyo<br><br>Yelo <input type="checkbox"/> Iyai <input type="checkbox"/> Ngingu- <input type="checkbox"/> | 9. Kwala nyala ali ni chindu<br><br>Yelo <input type="checkbox"/> Iyai <input type="checkbox"/> Ngingu- <input type="checkbox"/>                                                   | 10. Mpakana asose chindu chamwasitile mpala chidole/changandila<br><br>Yelo <input type="checkbox"/> Iyai <input type="checkbox"/> Ngingu- <input type="checkbox"/>            | 11. Kugomba ng'oma<br><br>Yelo <input type="checkbox"/> Iyai <input type="checkbox"/> Ngingu- <input type="checkbox"/>                       | 12. Akusa lokota yindu ya wana wana ni yala<br><br>Yelo <input type="checkbox"/> Iyai <input type="checkbox"/> Ngingu- <input type="checkbox"/>    | 13. Mpakana ajase imanga yewiche mwi botolo<br><br>Yelo <input type="checkbox"/> Iyai <input type="checkbox"/> Ngingu- <input type="checkbox"/>        | 14. Akulembaga pasi<br><br>Yelo <input type="checkbox"/> Iyai <input type="checkbox"/> Ngingu- <input type="checkbox"/>                         |
| 15. Mpakana asajikane njelwa siwili-pakana syasye<br><br>Yelo <input type="checkbox"/> Iyai <input type="checkbox"/> Ngingu- <input type="checkbox"/> | 16. Kwanganya yindu muma kapo gawili<br><br>Yelo <input type="checkbox"/> Iyai <input type="checkbox"/> Ngingu- <input type="checkbox"/>                                           | 17. Akusagumba mpila<br><br>Yelo <input type="checkbox"/> Iyai <input type="checkbox"/> Ngingu- <input type="checkbox"/>                                                       | 18. Mpakana asajikanye mcheche<br><br>Yelo <input type="checkbox"/> Iyai <input type="checkbox"/> Ngingu- <input type="checkbox"/>           | 19. Mpakana alembe musela wejongo che munsanga<br><br>Yelo <input type="checkbox"/> Iyai <input type="checkbox"/> Ngingu- <input type="checkbox"/> | 20. Mpakana atunje yuma ni singano<br><br>Yelo <input type="checkbox"/> Iyai <input type="checkbox"/> Ngingu- <input type="checkbox"/>                 | 21. Mpakana asajikanye njelwa nsano nastatu<br><br>Yelo <input type="checkbox"/> Iyai <input type="checkbox"/> Ngingu- <input type="checkbox"/> |
| 22. Kupanganya nyumba niyisonde<br><br>Yelo <input type="checkbox"/> Iyai <input type="checkbox"/> Ngingu- <input type="checkbox"/>                   | 23. Mpakana alembe zilo<br><br>Yelo <input type="checkbox"/> Iyai <input type="checkbox"/> Ngingu- <input type="checkbox"/>                                                        | 24. Mpakana alembe mtanda<br><br>Yelo <input type="checkbox"/> Iyai <input type="checkbox"/> Ngingu- <input type="checkbox"/>                                                  | 25. Akusagumba mundu<br><br>Yelo <input type="checkbox"/> Iyai <input type="checkbox"/> Ngingu- <input type="checkbox"/>                     | 26. Mpakana ajambule libokosi la folo kona<br><br>Yelo <input type="checkbox"/> Iyai <input type="checkbox"/> Ngingu- <input type="checkbox"/>     | 27. Mpakana ajambule mundu mwakuwonechela<br><br>Yelo <input type="checkbox"/> Iyai <input type="checkbox"/> Ngingu- <input type="checkbox"/>          | 28. Kusagua inu mmagulu<br><br>Yelo <input type="checkbox"/> Iyai <input type="checkbox"/> Ngingu- <input type="checkbox"/>                     |
| 29. Kupanganya yang'andira mpela galimoto<br><br>Yelo <input type="checkbox"/> Iyai <input type="checkbox"/> Ngingu- <input type="checkbox"/>         | 30. Mpakana ako mbole paitela iwili che jipi ni chelewu kuyilekanganya ka tatu<br><br>Yelo <input type="checkbox"/> Iyai <input type="checkbox"/> Ngingu- <input type="checkbox"/> | 31. Mpakana akombole kulekanganya libokosi yawusito ni iyakupepuka ka tatu<br><br>Yelo <input type="checkbox"/> Iyai <input type="checkbox"/> Ngingu- <input type="checkbox"/> | 32. Alembe mundu ni iwalo nsanu na chimo<br><br>Yelo <input type="checkbox"/> Iyai <input type="checkbox"/> Ngingu- <input type="checkbox"/> | 33. Mpakana akombole kulekanganya mitundu<br><br>Yelo <input type="checkbox"/> Iyai <input type="checkbox"/> Ngingu- <input type="checkbox"/>      | 34. Mpakana akombole kutawa milato ni idina/njerwa<br><br>Yelo <input type="checkbox"/> Iyai <input type="checkbox"/> Ngingu- <input type="checkbox"/> |                                                                                                                                                                                                                                    |
